# Supplementary material for: Molecular simulation of CO production and adsorption in a coal–kaolinite composite gangue slit model
Source: Royal Society of Chemistry journal article supplement (doi:10.1039/d4ra03151b), 2024-01-01
Supplement: d4ra03151b1.pdf [file d4ra03151b1.pdf]

## Supplementary Information

### 1 Langmuir and Freundlich equations fitting comparison

**Table 1**

Langmuir parameters of CO at different temperatures

| Temperature/<br>K | KCK model                         |                       |        | TriK model                        |                       |        |
|-------------------|-----------------------------------|-----------------------|--------|-----------------------------------|-----------------------|--------|
|                   | $a/(\text{mL}\cdot\text{g}^{-1})$ | $b/(\text{MPa}^{-1})$ | $R^2$  | $a/(\text{mL}\cdot\text{g}^{-1})$ | $b/(\text{MPa}^{-1})$ | $R^2$  |
| 293.15            | 44.09                             | 0.06                  | 0.9985 | 25.99                             | 0.09                  | 0.9983 |
| 303.15            | 40.24                             | 0.05                  | 0.9975 | 23.67                             | 0.09                  | 0.9992 |
| 313.15            | 35.10                             | 0.06                  | 0.9992 | 23.20                             | 0.08                  | 0.9976 |
| 323.15            | 35.06                             | 0.06                  | 0.9984 | 23.12                             | 0.08                  | 0.9971 |
| 333.15            | 32.55                             | 0.06                  | 0.9984 | 22.28                             | 0.07                  | 0.9990 |

**Table 2**

Freundlich parameters of CO at different temperatures

| Temperature/<br>K | KCK model                         |                       |        | TriK model                        |                       |        |
|-------------------|-----------------------------------|-----------------------|--------|-----------------------------------|-----------------------|--------|
|                   | $a/(\text{mL}\cdot\text{g}^{-1})$ | $b/(\text{MPa}^{-1})$ | $R^2$  | $a/(\text{mL}\cdot\text{g}^{-1})$ | $b/(\text{MPa}^{-1})$ | $R^2$  |
| 293.15            | 2.58                              | 0.80                  | 0.9992 | 2.20                              | 0.85                  | 0.9991 |
| 303.15            | 2.29                              | 0.83                  | 0.9990 | 1.76                              | 0.94                  | 0.9995 |
| 313.15            | 2.07                              | 0.90                  | 0.9982 | 1.52                              | 0.95                  | 0.9985 |
| 323.15            | 1.93                              | 0.91                  | 0.9989 | 1.97                              | 0.90                  | 0.9985 |
| 333.15            | 1.80                              | 0.94                  | 0.9996 | 1.55                              | 1.04                  | 0.9992 |

### 2 The fitting parameters of the Freundlich equation for the adsorption capacity of Al-O and Si-O planes

**Table 3**

Freundlich parameters of CO at 2 planes of kaolinite

| Temperature/<br>K | Al-O                              |                       |        | Si-O                              |                       |        |
|-------------------|-----------------------------------|-----------------------|--------|-----------------------------------|-----------------------|--------|
|                   | $a/(\text{mL}\cdot\text{g}^{-1})$ | $b/(\text{MPa}^{-1})$ | $R^2$  | $a/(\text{mL}\cdot\text{g}^{-1})$ | $b/(\text{MPa}^{-1})$ | $R^2$  |
| 293.15            | 1.69                              | 0.66                  | 0.9771 | 1.67                              | 0.55                  | 0.9928 |
| 303.15            | 1.56                              | 0.62                  | 0.9222 | 1.23                              | 0.80                  | 0.9796 |
| 313.15            | 1.56                              | 0.62                  | 0.9222 | 1.23                              | 0.80                  | 0.9796 |
| 323.15            | 1.62                              | 0.59                  | 0.9423 | 1.02                              | 1.09                  | 0.9315 |
| 333.15            | 0.80                              | 1.62                  | 0.9601 | 1.38                              | 0.46                  | 0.9126 |

### 3 Free volume

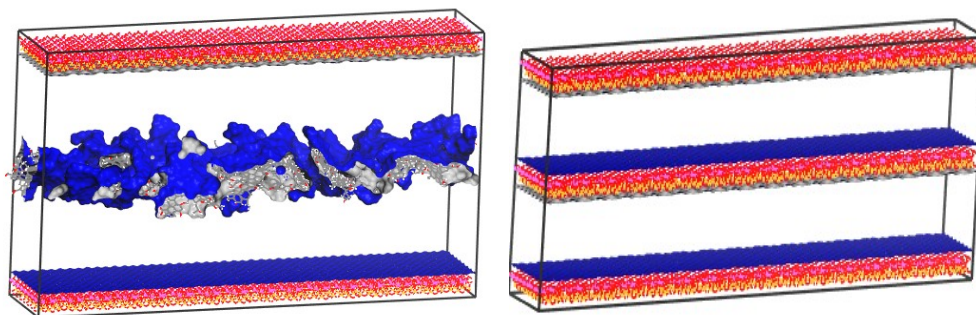

**Fig.1** The Connolly surface of both models

KCK Free Volume:  $384701.12 \text{ \AA}^3$ , TriK Free Volume:  $246018.35 \text{ \AA}^3$ . (Connolly radius 0.184nm, Grid interval 0.04nm)

The extra free volume mainly comes from the pores of the layer carbon-containing structure.

#### 4 Module introduction

Forcite: It is a classic molecular dynamics tool, developed from the discover module, which is used to perform a range of computational tasks, including fast energy calculations and geometric optimization for both monomolecular and periodic systems.

Qeq: Charge Equilibration is used in the calculation.

Amorphous Cell: It is a tool that uses the Monte Carlo method to set up the amorphous model. It can be used to build models with various components and different proportions.

Atom Based : It is a direct calculation method that directly calculates the non-bonding interactions between pairs of atoms. When the distance between pairs of atoms exceeds the set cutoff radius, the system considers the interaction between the pairs to be zero.

#### 5 Distribution of CO adsorption density

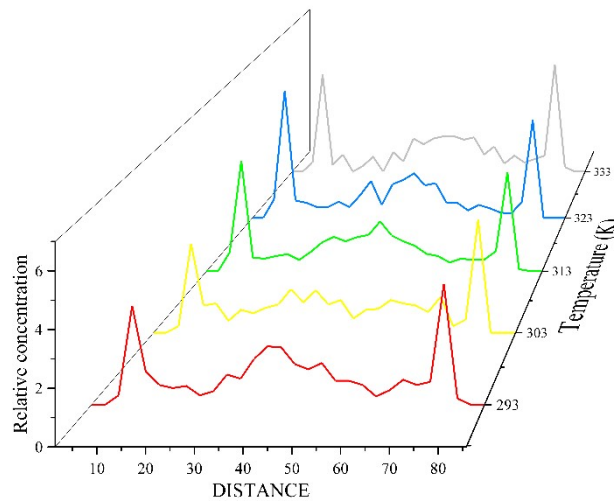

**Fig.2** Relative density distribution curve of 1MPa

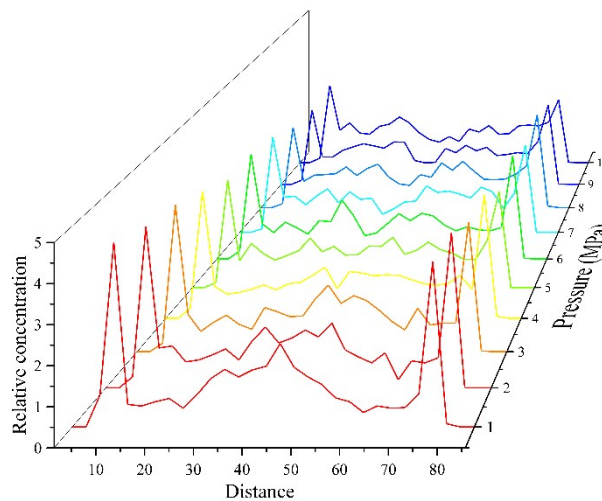

**Fig.3** Relative density distribution curve of 313.15K

It can be seen that the shape of the density distribution curve is similar at the same temperature point and pressure point.

However, as more CO molecules are adsorbed, a large number of CO molecules fill the vacuum layer, causing the peak in the middle part to be less obvious.
